# Supplementary material
Source: publisher figshare collection journal article supplement (https://karger.figshare.com/articles/dataset/_/13373120)
Supplement: Supplementary file 1 [file 1]

Figure 2A. INSEF fieldwork flowchart


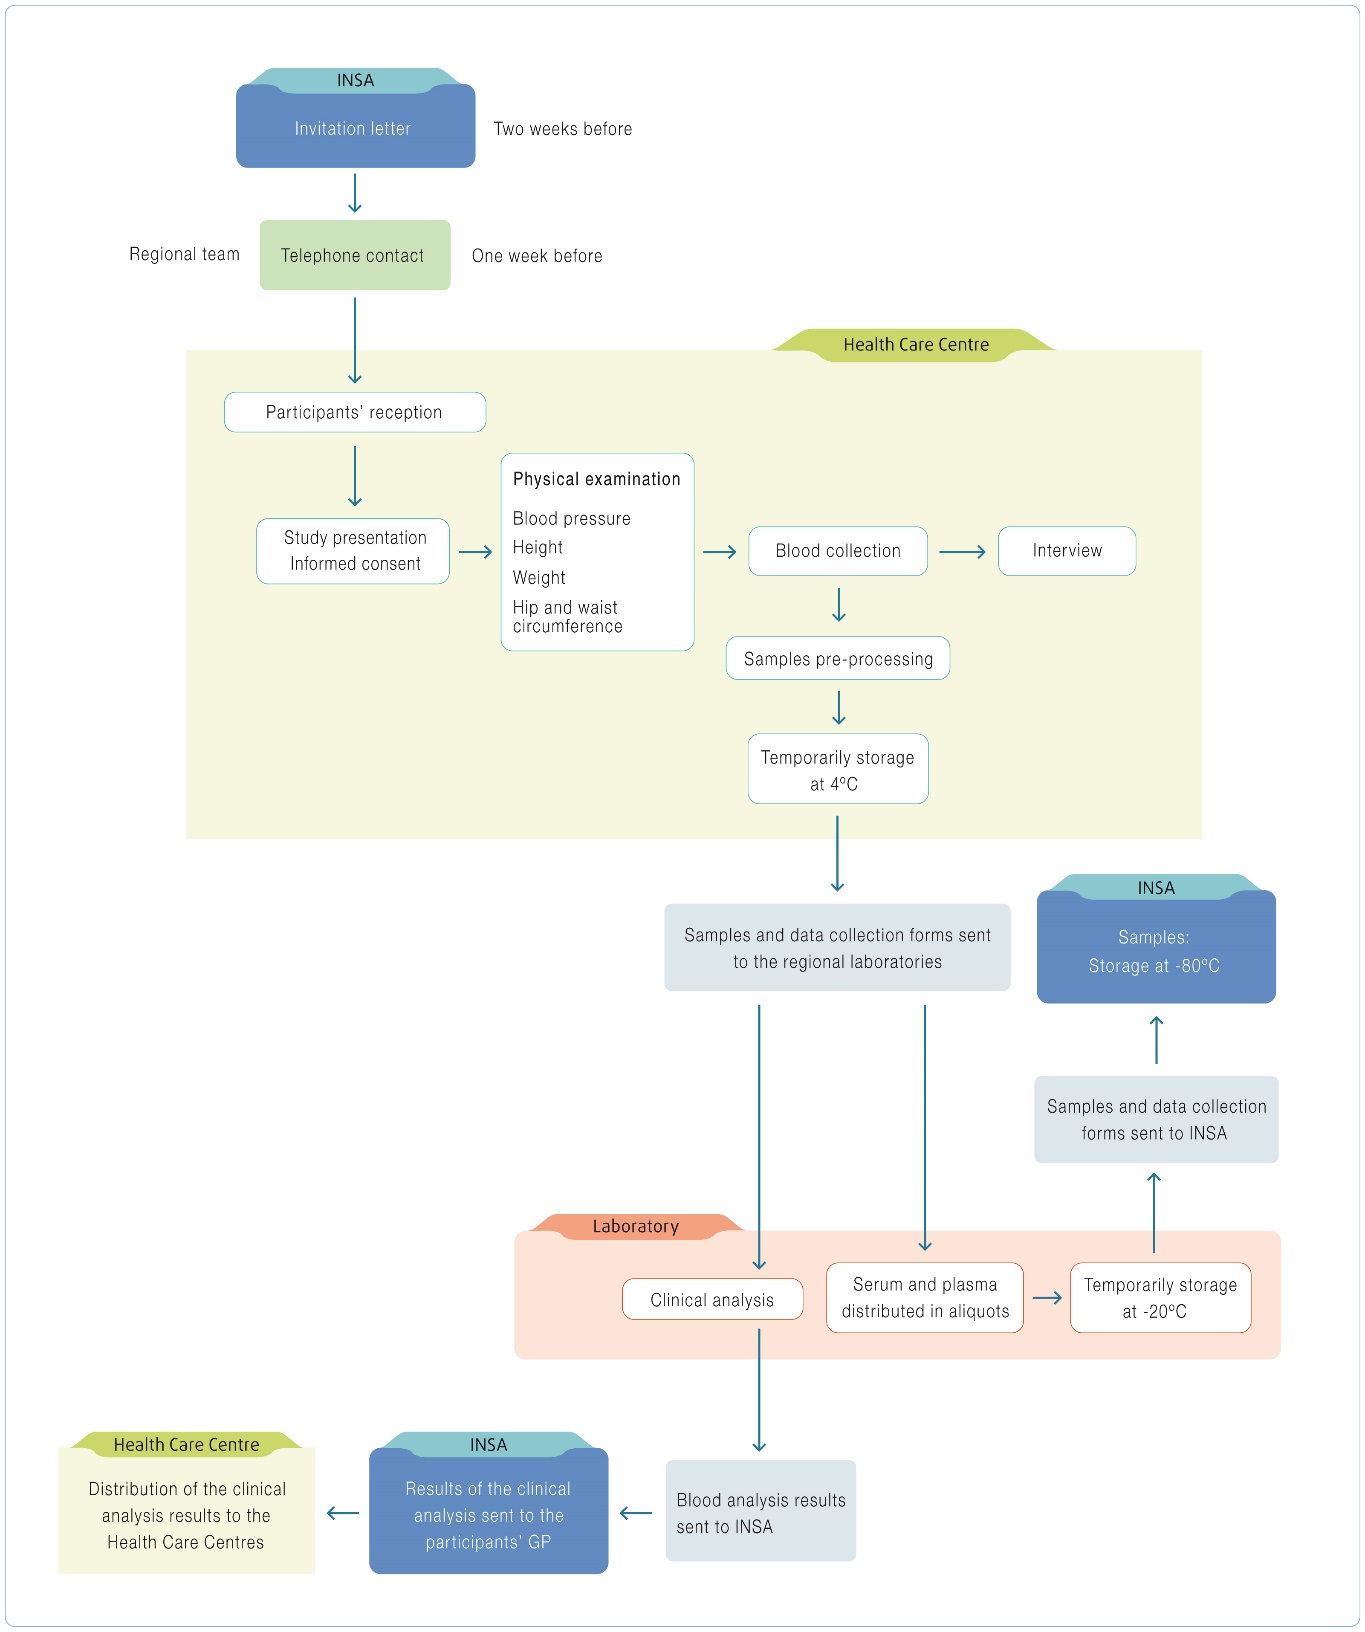


*Adapted from Nunes et al. (2018) The first Portuguese National Health Examination Survey (2015): design, planning and implementation, Journal of Public Health, fdy150, https://doi.org/10.1093/pubmed/fdy150
